# Supplementary material for: Ti-Doped WO3 synthesized by a facile wet bath method for improved electrochromism
Source: Royal Society of Chemistry journal article supplement (doi:10.1039/c7tc02456h), 2017-01-01
Supplement: c7tc02456h1.pdf [file c7tc02456h1.pdf]

Supporting information for

**Ti-doped WO<sub>3</sub> synthesized by a facile wet bath method for improved  
electrochromism**

Yi Zhan,<sup>a</sup> Ming Rui Jeol Tan,<sup>a</sup> Xing Cheng,<sup>a</sup> Wei Ming Alvin Tan,<sup>a</sup> Guo Fa Cai,<sup>a</sup> Jing  
Wei Chen,<sup>a</sup> Vipin Kumar,<sup>a</sup> Shlomo Magdassi,<sup>b\*</sup> Pooi See Lee<sup>a\*</sup>

<sup>a</sup>School of Materials Science and Engineering, Nanyang Technological University,  
639798, Singapore. \*E-mail: pslee@ntu.edu.sg

<sup>b</sup>Institute of Chemistry and the Center for Nanoscience and Nanotechnology,  
The Hebrew University of Jerusalem, Jerusalem, 91904, Israel. \*E-mail:  
magdassi@mail.huji.ac.il

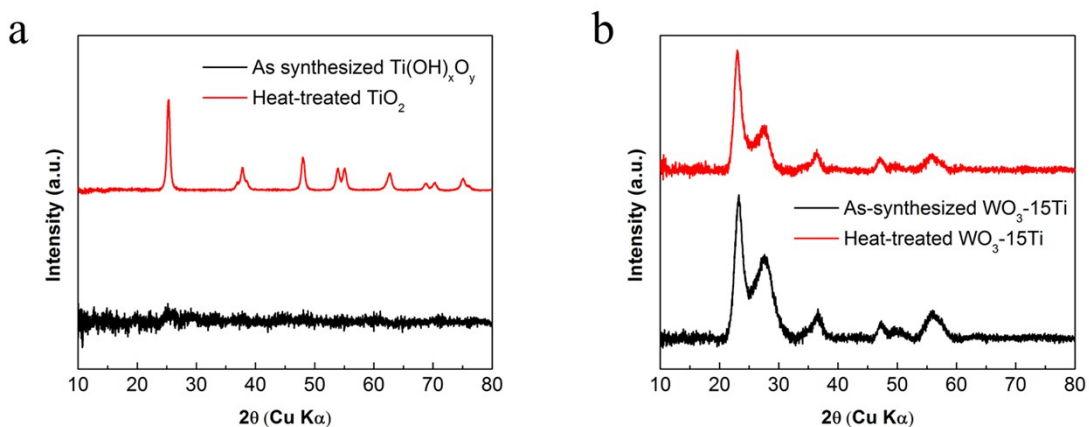

Figure S1. XRD diffractogram comparisons of  $\text{Ti(OH)}_x\text{O}_y$  (a) and  $\text{WO}_3\text{-15Ti}$  (b) before and after the same heat-treatment.

Amorphous  $\text{Ti(OH)}_x\text{O}_y$  was obtained with the similar synthesis, it was difficult to determine whether there was  $\text{Ti(OH)}_x\text{O}_y$  impurity in the Ti-doped  $\text{WO}_3$  sample.  $\text{WO}_3$  was doped with the highest Ti(IV) content in the  $\text{WO}_3\text{-15Ti}$  which was calcined at 400 °C for 2 h in the air. No impurity peak was detected in its XRD pattern after the calcination, suggesting that there was no impure titanium compounds formed during synthesis.

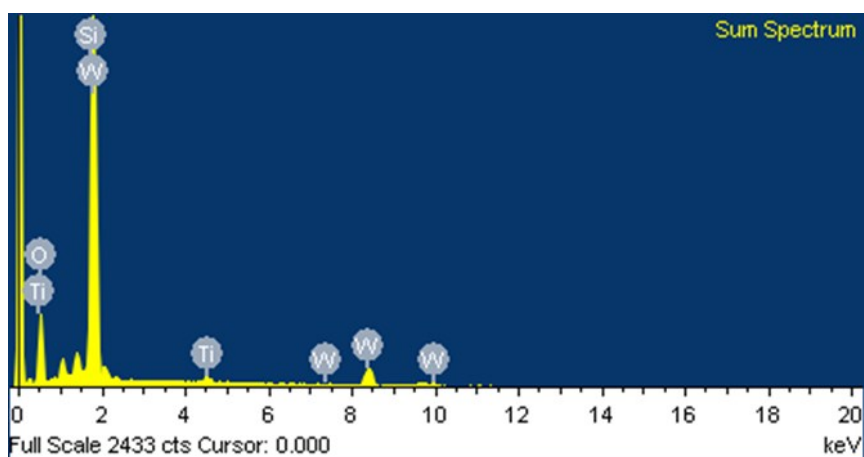

Figure S2. EDS mapping analysis of  $\text{WO}_3\text{-10Ti}$  film

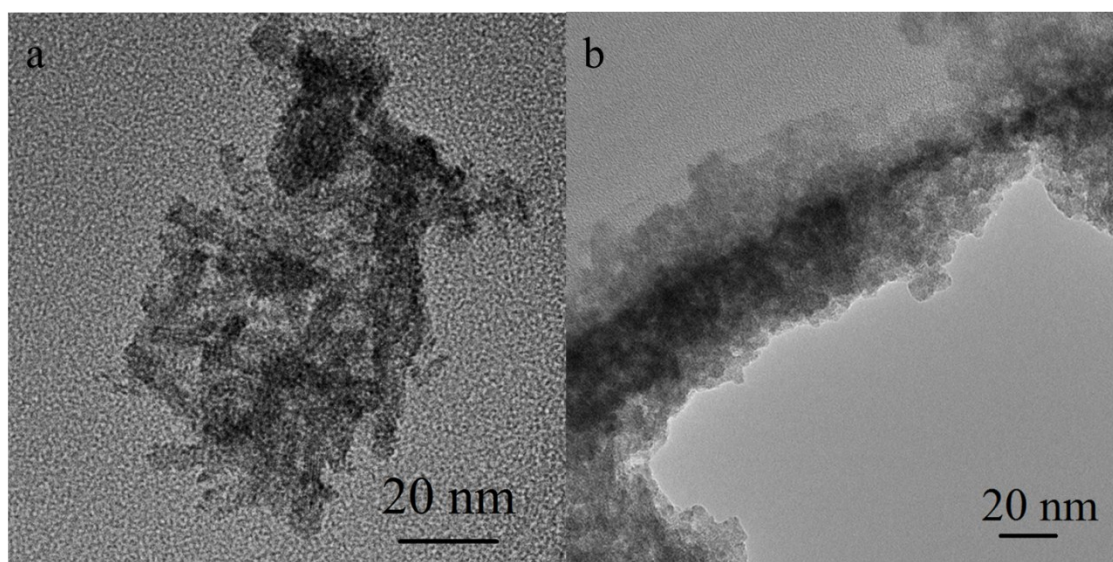

Figure S3. TEM images of WO<sub>3</sub>-5Ti (a) and -15Ti (b)

Table S1. Parameters of WO<sub>3</sub> samples, including crystallite size, BET surface area, atomic ratio and the diffusion coefficient

| <b>Material</b>            | <b>Crystallite size (nm)</b> | <b>BET surface area (m<sup>2</sup> g<sup>-1</sup>)</b> | <b>Ti/(Ti+W) (at. %)</b> | <b>The diffusion coefficient <i>D</i> (cm<sup>2</sup> s<sup>-1</sup>)</b> |
|----------------------------|------------------------------|--------------------------------------------------------|--------------------------|---------------------------------------------------------------------------|
| <b>WO<sub>3</sub></b>      | 32.9                         | 34.9378                                                | 0                        | 6.76011E-9                                                                |
| <b>WO<sub>3</sub> -1Ti</b> | 28.2                         | 54.5812                                                | 0.8                      | 5.5733E-9                                                                 |
| <b>WO<sub>3</sub>-5Ti</b>  | 15.6                         | 86.8863                                                | 5.2                      | 4.70695E-9                                                                |
| <b>WO<sub>3</sub>-10Ti</b> | 10.8                         | 85.8344                                                | 8.4                      | 4.41936E-9                                                                |
| <b>WO<sub>3</sub>-15Ti</b> | 8.9                          | 84.1097                                                | 12.9                     | 2.47947E-9                                                                |

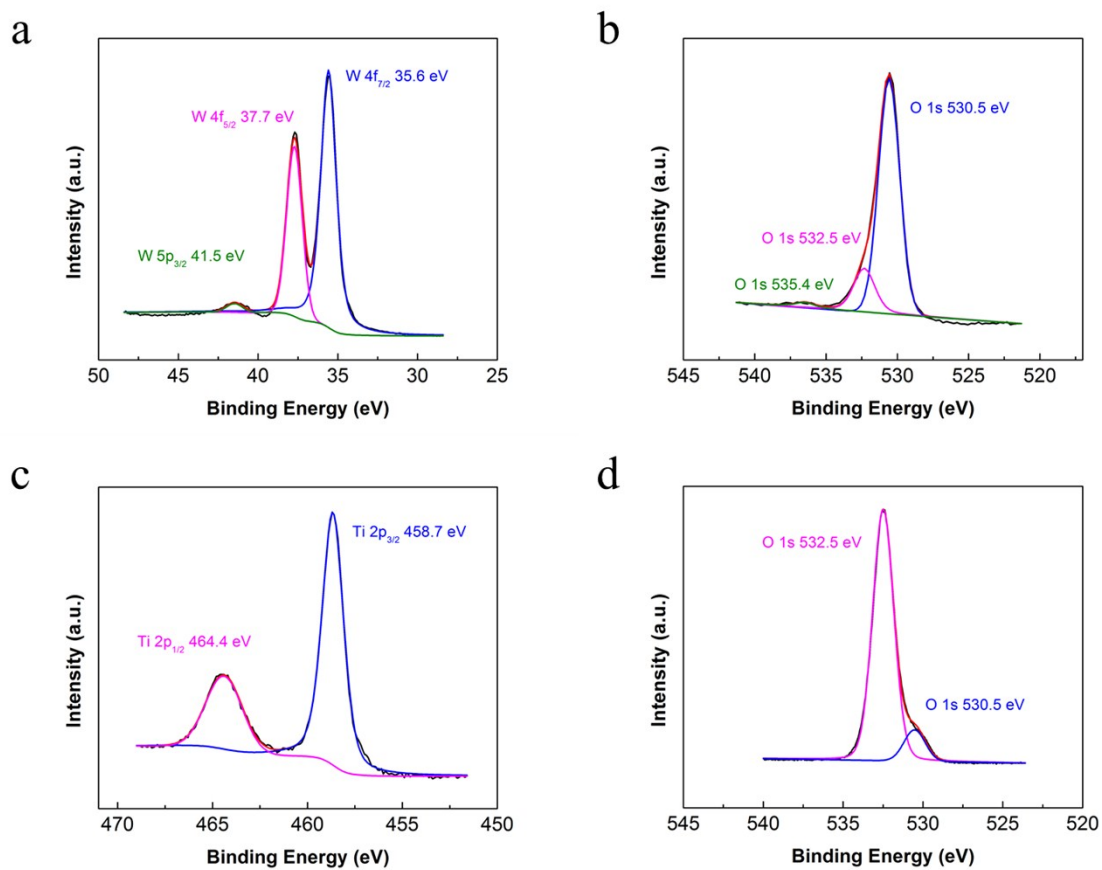

Figure S4. The XPS spectra of the main elements for  $\text{WO}_3$  (a and b) and  $\text{Ti}(\text{OH})_x\text{O}_y$  (c and d)

Table S2. Literature survey of WO<sub>3</sub> with the best CE for electrochromism at the wavelength of 633 nm

| Material                                                                     | $\Delta T(\%)$ | CE (cm <sup>2</sup> C <sup>-1</sup> ) | Reference                            |
|------------------------------------------------------------------------------|----------------|---------------------------------------|--------------------------------------|
| <b>Ti-doped WO<sub>3</sub> nanocrystals</b>                                  | 67.6           | 106.6                                 | This work                            |
| <b>WO<sub>3</sub> nanoparticles on the silver grid/PEDOT:PSS hybrid film</b> | 81.9           | 124.5                                 | Adv. Energy Mater., 2016, 6, 1501882 |
| <b>WO<sub>3</sub>·2H<sub>2</sub>O thin film</b>                              | 53.8           | 107.8                                 | J. Mater. Chem., 2012, 22, 19904     |
| <b>WO<sub>3</sub> nanowire array film</b>                                    | 58             | 102.8                                 | J. Mater. Chem., 2011, 21, 5492      |

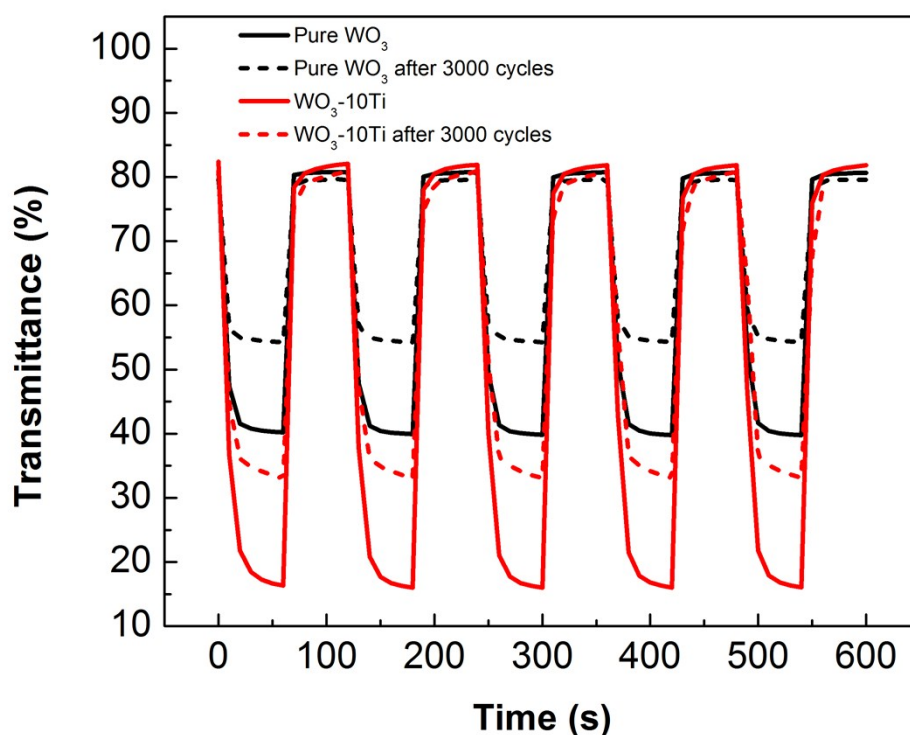

Figure S5. The optical response of pure WO<sub>3</sub> and WO<sub>3</sub>-10Ti before and after 3000 cycles operation
